# Supplementary material for: Cooperative and alternate functions for STIM1 and STIM2 in macrophage activation and in the context of inflammation
Source: PubMed Central journal article supplement (PMC4578517; doi:10.1002/iid3.56), 2015-05-12
Supplement: iid30003-0154-sd1.pdf [file iid30003-0154-sd1.pdf]

## Supplementary Figures

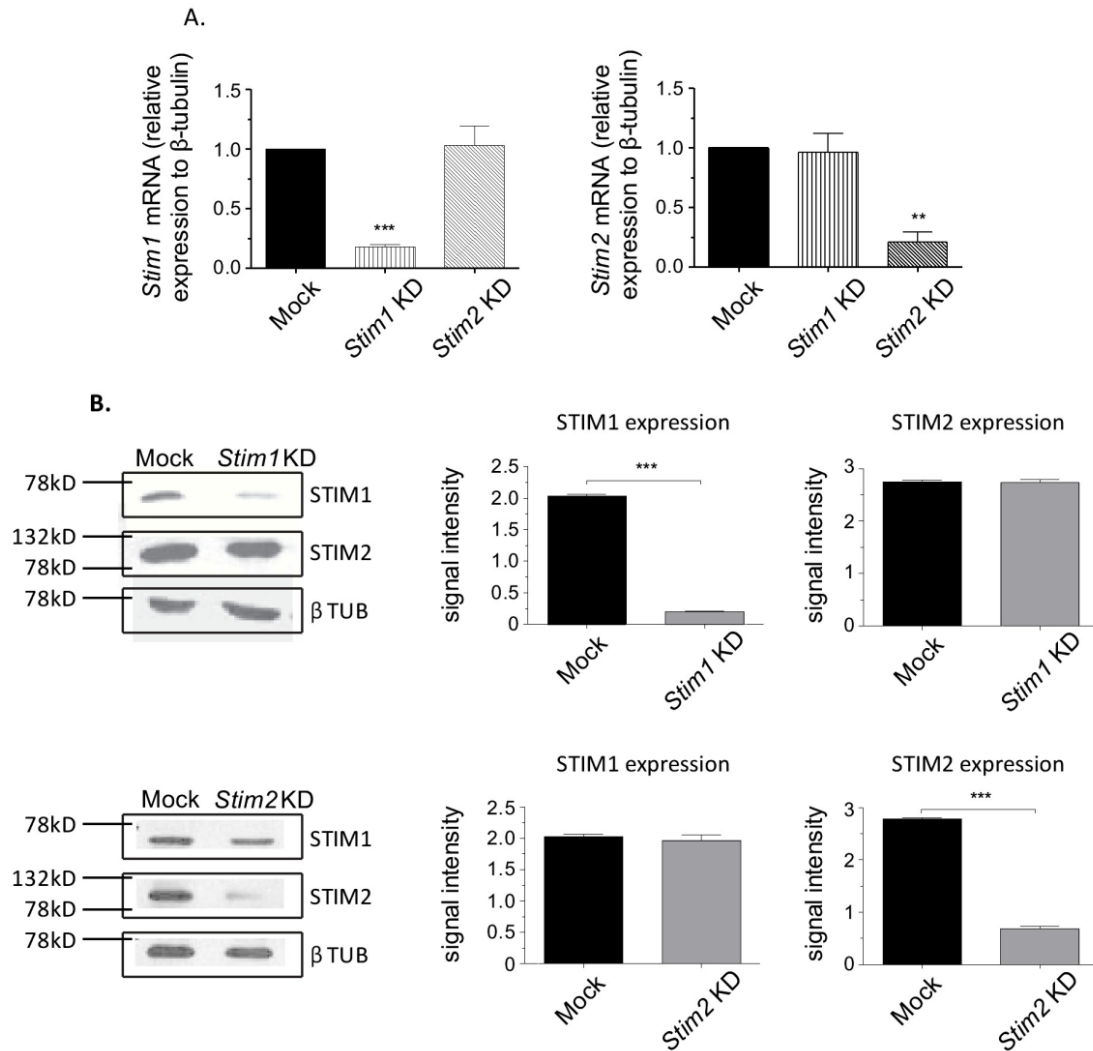

**Suppl. Figure 1:** Generation of macrophage *Stim1* and *Stim2* KD cells.

**(A)** Real-time RT-PCR ( $\Delta\Delta C_t$ ) analysis of *Stim1* and *Stim2* mRNA following treatment of RAW264.7 cells with shRNA against STIM1 or STIM2. Results of qPCR-selected *Stim1* and *Stim2* KD RAW264.7 cell clones with high shRNA silencing efficiency are shown. Data are expressed as mean relative *Stim* to  $\beta$ -tubulin mRNA  $\pm$  SEM of  $n=3$  independent experiments (\*\*\*)  $P < 0.001$ . **(B)** Immunoblot analysis of STIM1 and STIM2 expression in mock-transfected and *Stim1* and *Stim2* KD RAW264.7 cells (upper part: *Stim1* KD analysis; lower part: *Stim2* KD analysis);  $\beta$ -tubulin served as a loading control. Left panels: representative blots. Middle and right panels: densitometric analysis of individual blots. The results shown are the mean signal intensities ( $\pm$  SEM) for STIM1 and STIM2, each normalized to the signal intensity of the  $\beta$ -tubulin signal of the same sample (arbitrarily defined as 1.0) (\*\*\*)  $P < 0.001$ .

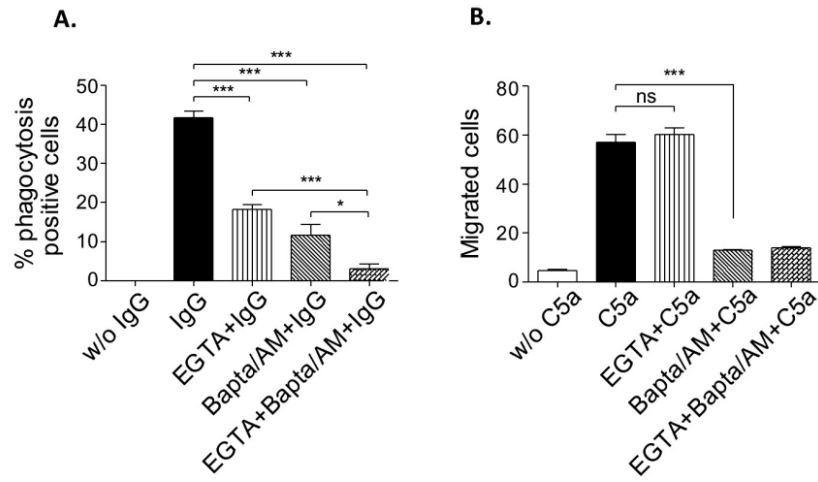

**Suppl. Figure 2:** Different effects of intracellular vs. extracellular  $\text{Ca}^{2+}$  chelation/inhibition on RAW264.7 cell mediated functions.

RAW264.7 cells were cultured in the presence of  $\text{Ca}^{2+}$ -specific chelators (EGTA, or Bapta/AM) or a combination of both (EGTA + Bapta/AM) and assayed for **(A)** IgG-induced phagocytosis (IgG), and **(B)** C5a-induced chemotactic migration (C5a). **(A)** RAW264.7 cells were incubated with uncoated (w/o IgG) or IgG-coated (IgG) MRBC for 90 min. at  $37^\circ\text{C}$  followed by the lysis of extracellular MRBC. The percentage of positive cells that ingested more than 1 MRBC was assessed microscopically. **(B)** RAW264.7 cells were stimulated for 4 hours with or without (w/o) 50 ng/ml of C5a and migrated cells were determined by Transwell migration assay. All results are expressed as mean  $\pm$  SEM of 4 independent experiments (ns;  $*P < 0.05$ ;  $***P < 0.001$ ).

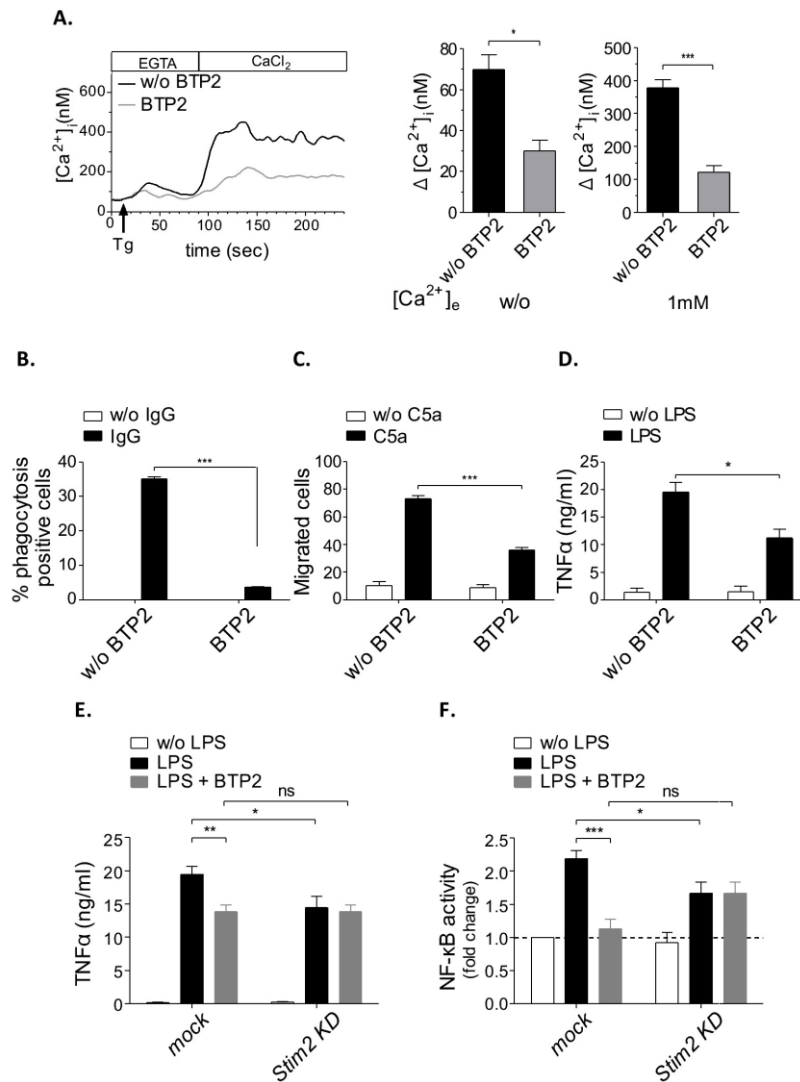

**Suppl. Figure 3:** Defective TG-induced  $Ca^{2+}$  ER store release, SOCE, phagocytosis, chemotaxis, and TLR4 activation in BTP2-treated RAW264.7 macrophages.

**(A)** RAW264.7 cells treated or not with BTP2 were loaded with Fura2/AM, stimulated with 2  $\mu$ M TG in EGTA-containing buffer (w/o  $[Ca^{2+}]_e$ ) followed by the addition of  $CaCl_2$  (1 mM  $[Ca^{2+}]_e$ ) and monitoring of  $[Ca^{2+}]_i$ . Representative measurements (left panel) and maximal ( $\Delta [Ca^{2+}]_i \pm$  SEM) values ( $n=4$  per group) in the absence (w/o  $[Ca^{2+}]_e$ ) (middle panel) and presence (1 mM  $[Ca^{2+}]_e$ ) of extracellular  $Ca^{2+}$  (right panel) are shown (\* $P < 0.05$ ; \*\*\* $P < 0.001$ ). Both TG-induced  $Ca^{2+}$  ER store release and SOCE are blocked by BTP2. **(B)** BTP2-treated cells were incubated with uncoated (w/o IgG) or IgG-coated MRBCs and the percentage of phagocytosis was assessed. **(C)** C5a-induced chemotaxis was determined by Transwell migration assay. **(D)** LPS-induced secretion of TNF $\alpha$  was analyzed by ELISA. **(E)** *Stim2* KD RAW264.7 cells and mock-transfected controls were treated with BTP2 or left untreated, stimulated with 100 ng/ml LPS and analyzed 24 hours later for TNF $\alpha$  release by ELISA. **(F)** *Stim2* KD and mock control cells were transfected with the pGL4.32 [*luc2P/NF- $\kappa$ B-RE/Hygro*]. Relative NF- $\kappa$ B activity 3 hours after LPS stimulation in BTP2-treated or untreated cells is depicted. **(B-F)** Results are expressed as mean  $\pm$  SEM of 3 independent experiments (\* $P < 0.05$ ; \*\* $P < 0.01$ ; \*\*\* $P < 0.001$ ).

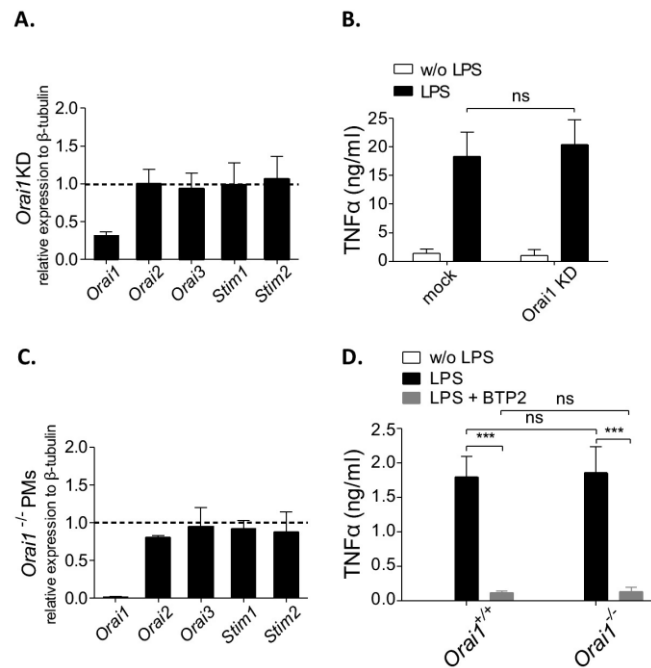

**Suppl. Figure 4:** LPS-induced TNF $\alpha$  release occurs normally in *Orai1* KD cells and *Orai1*<sup>-/-</sup> PM.

**(A)** Real-time RT-PCR ( $\Delta\Delta$ Ct) analysis of *Orai* / *Stim* mRNA following treatment of RAW264.7 cells with shRNA against *Orai1*. **(B)** *Orai1* KD cells were stimulated with 100 ng/ml LPS and analyzed at 24 hours for the release of TNF $\alpha$  by ELISA. **(C)** Real-time RT-PCR ( $\Delta\Delta$ Ct) analysis of *Orai* / *Stim* mRNA in *Orai1*<sup>-/-</sup> PM cells (the dashed line indicates wild-type expression in *Orai1*<sup>+/+</sup> PM cells). **(D)** *Orai1*<sup>-/-</sup> and *Orai1*<sup>+/+</sup> PM cells were treated with BTP2 or left untreated and stimulated with 100 ng/ml LPS and analyzed at 24 hours for the release of TNF $\alpha$  by ELISA. **(A-D)** Results are expressed as mean  $\pm$  SEM of 3 independent experiments (\*\*\*)  $P < 0.001$ ; ns = not significant).
